# Supplementary material for: Prognostic nomogram and score to predict overall survival in locally advanced untreated pancreatic cancer (PROLAP)
Source: PubMed Central journal article supplement — Br J Cancer. 2016 Jul 12;115(3):281–9. doi: 10.1038/bjc.2016.212 (PMC4973163; doi:10.1038/bjc.2016.212), 2016-07-12
Supplement: bjc2016212x1.pdf [file bjc2016212x1.pdf]

# Appendix

## Table of contents:

|                                                                                                                                                                                                                                                      |           |
|------------------------------------------------------------------------------------------------------------------------------------------------------------------------------------------------------------------------------------------------------|-----------|
| <b>Appendix A1 - Eligibility criteria and procedures .....</b>                                                                                                                                                                                       | <b>3</b>  |
| <b>Development cohort: the LAP07 trial .....</b>                                                                                                                                                                                                     | <b>3</b>  |
| Eligibility criteria.....                                                                                                                                                                                                                            | 3         |
| Treatment and procedures .....                                                                                                                                                                                                                       | 3         |
| <b>External validation cohort: consecutive patients treated at University Hospital of Besancon .....</b>                                                                                                                                             | <b>4</b>  |
| Eligibility criteria.....                                                                                                                                                                                                                            | 4         |
| Treatment and procedures .....                                                                                                                                                                                                                       | 4         |
| <b>Appendix A2 – Statistical analyses interpretation.....</b>                                                                                                                                                                                        | <b>4</b>  |
| <b>Discrimination.....</b>                                                                                                                                                                                                                           | <b>4</b>  |
| <b>Calibration .....</b>                                                                                                                                                                                                                             | <b>5</b>  |
| <b>Bootstrapping .....</b>                                                                                                                                                                                                                           | <b>5</b>  |
| <b>Internal validation.....</b>                                                                                                                                                                                                                      | <b>5</b>  |
| <b>External validation .....</b>                                                                                                                                                                                                                     | <b>5</b>  |
| <b>Appendix Table A1: (A) Final multivariate model adjusted for R1 treatment (N = 358), (B) Final multivariate model adjusted for grading and systolic blood pressure (N = 216), (C) Final multivariate model multiple imputation analysis .....</b> | <b>6</b>  |
| <b>Appendix A3 - General theoretical aspects .....</b>                                                                                                                                                                                               | <b>8</b>  |
| <b>Risk estimation by a Cox model.....</b>                                                                                                                                                                                                           | <b>8</b>  |
| <b>Nomogram development .....</b>                                                                                                                                                                                                                    | <b>8</b>  |
| Survival probability estimation at time of interest .....                                                                                                                                                                                            | 8         |
| Median survival estimation.....                                                                                                                                                                                                                      | 9         |
| Survival estimation confidence interval.....                                                                                                                                                                                                         | 9         |
| Risk factors and attributed points.....                                                                                                                                                                                                              | 10        |
| Nomogram Illustration.....                                                                                                                                                                                                                           | 11        |
| <b>Construction of the PROLAP prognostic score .....</b>                                                                                                                                                                                             | <b>12</b> |
| Derived from the multivariate final Cox model: .....                                                                                                                                                                                                 | 12        |

|                                                                                                                                                                                                                                                |           |
|------------------------------------------------------------------------------------------------------------------------------------------------------------------------------------------------------------------------------------------------|-----------|
| Derived from the nomogram: .....                                                                                                                                                                                                               | 12        |
| Determination of cut-off values in total sum of points derived from the nomogram in order to<br>determine groups issued from the normalized prognostic score of the model:.....                                                                | 13        |
| <b>Appendix Figure A1. Hothorn &amp; Lausen optimal cut point method plot .....</b>                                                                                                                                                            | <b>14</b> |
| <b>Appendix Figure A2: Kaplan-Meier curves for overall survival in (A,C) the<br/>development set cohort and (B,D) the external validation set cohort according to<br/>the prognostic score group for the median and tertile approach. ....</b> | <b>15</b> |
| <b>Appendix Table A1. Patient characteristics according to prognostic score groups<br/>derived A in the two risk group approach and B in the three risk group approach:<br/>.....</b>                                                          | <b>16</b> |
| <b>Appendix A4 Predictive value of treatments on OS according to the risk groups</b>                                                                                                                                                           | <b>17</b> |
| Two risk group approach.....                                                                                                                                                                                                                   | 17        |
| Three risk group approach .....                                                                                                                                                                                                                | 17        |
| <b>Appendix Table A2. Baseline characteristics of the external validation set cohort<br/>according to the eligibility status for staging system .....</b>                                                                                      | <b>18</b> |

## **Appendix A1 - Eligibility criteria and procedures**

### **Development cohort: the LAP07 trial**

#### **Eligibility criteria**

Main eligibility criteria were: histologically proven adenocarcinoma of the pancreas, de novo locally advanced unresectable tumour (stage III according to the UICC 2002 classification), measurable or evaluable disease (RECIST 1.0 criteria), no prior abdominal radiotherapy nor chemotherapy for any reason, performance status 0-2 (according to the WHO classification), and adequate biological tests (blood, liver, and kidney).

Main exclusion criteria were: stage IA to IIB or stage IV cancer (according to the TNM UICC 2002 classification), ampullary and periampullary carcinomas, prior chemotherapy (for any reason), abdominal radiotherapy, or treatment with an anti-EGFR, and allergy to any erlotinib ingredients.

#### **Treatment and procedures**

At enrolment, the first randomisation to gemcitabine versus gemcitabine plus erlotinib was performed using a minimization procedure with stratification according to centre and WHO performance status (0-1 versus 2). For patients whose tumour was controlled after 4 months of induction chemotherapy a second randomisation to chemoradiotherapy versus chemotherapy continuation was stratified by centre and the treatment given at the first randomisation.

The study was approved by the Comité de Protection des Personnes (CPP) de l'Île de France (French advisory committee for the Protection of Subjects in Biomedical Research, Ile de France) and conducted in agreement with article L.1123-6 of the Public Health Code. All enrolled patients provided written informed consent.

## **External validation cohort: consecutive patients treated at University Hospital of Besancon**

### **Eligibility criteria**

Main eligibility criteria were: histologically proven adenocarcinoma of the pancreas, de novo locally advanced unresectable tumour (stage III according to the UICC 2002 classification), measurable or evaluable disease (RECIST 1.0 criteria), at least one administration of chemotherapy-based treatment between January 1, 2003 and December 31, 2013.

Main exclusion criteria were: stage IA to IIB or stage IV cancer according to the TNM classification (UICC 2002), ampullary and periampullary carcinomas, absence of chemotherapy-based treatment between January 1, 2003 and December 31, 2013.

### **Treatment and procedures**

All patients enrolled in the external validation cohort (n=106) were first treated with gemcitabine (51; 48%), gemcitabine and oxaliplatin (15; 14%), gemcitabine plus other drug except oxaliplatin (8; 8%), and FOLFOX with/without irinotecan (32; 30%)

This prospective population based cohort was constructed based on retrospectively collected data including baseline characteristics and outcomes information. The database was declared at the National French Commission for bioinformatics data and patient liberty (CNIL).

## **Appendix A2 – Statistical analyses interpretation**

### **Discrimination**

The C-index estimates the proportion of all pairwise patient combinations from the sample data whose survival time can be ordered such that the patient with the highest predicted survival is the one who actually survived longer (discrimination). The C-index ( $0 \leq C \leq 1$ ) is a probability of concordance between predicted and observed survival, with C-index = 0.5 for random predictions and C-index = 1 for a perfectly discriminating model.

## **Calibration**

Calibration refers to the ability to provide unbiased survival predictions in groups of similar patients. A prediction model is considered “well-calibrated” if the difference between predictions and observations in all groups of similar patients is close to 0 (perfect calibration). Any large deviation ( $P < 0.1$ ) indicates a lack of calibration.

## **Bootstrapping**

Bootstrapping is the preferred simulation technique that was first described by Bradley Efron. The original dataset is a random sample of patients being representative of a general population. Bootstrapping means generating a large number of datasets, each of which with the same sample size as the original one, by resampling with replacement (i.e., a previously selected patient may be selected again).

## **Internal validation**

Internal validation is useful to obtain an honest estimate of the model performance for patients that are similar to those in the development sample and to indicate an upper limit to the expected performance in other settings. The bootstrap approach is the preferred technique to assess internal validity.

## **External validation**

External validation may show different results from internal validation, since many aspects may be different between settings, including selection of patients, definition of variables, and diagnostic or therapeutic procedures. The strength of the evidence for the score validity is usually considered to be stronger with a fully external validation (other investigators, centres, etc.).

**Appendix Table A1: (A) Final multivariate model adjusted for R1 treatment (N = 358), (B) Final multivariate model adjusted for grading and systolic blood pressure (N = 216), (C) Final multivariate model multiple imputation analysis.**

**A**

|                           | Nr of patients | Nr of deaths | HR   | 95% CI       | P     |
|---------------------------|----------------|--------------|------|--------------|-------|
| Age at diagnosis, years   | 358            | 307          | 1.01 | 1.00 to 1.02 | 0.054 |
| Pain                      |                |              |      |              |       |
| No                        | 155            | 130          | 1    | -            |       |
| Yes                       | 203            | 177          | 1.29 | 1.02 to 1.63 | 0.033 |
| Albumin, g/L              | 358            | 307          | 0.96 | 0.94 to 0.98 | 0.001 |
| Tumour size, mm           | 358            | 307          | 1.01 | 1.00 to 1.01 | 0.027 |
| CA 19-9, U/ml (log-value) | 358            | 307          | 1.17 | 1.04 to 1.31 | 0.007 |
| R1 treatment              |                |              |      |              |       |
| Gemcitabine               | 179            | 153          | 1    | -            |       |
| Gemcitabine + Erlotinib   | 179            | 154          | 1.11 | 0.88 to 1.39 | 0.366 |

**B**

|                               | Nr of patients | Nr of deaths | HR   | 95% CI       | P     |
|-------------------------------|----------------|--------------|------|--------------|-------|
| Age at diagnosis, years       | 216            | 187          | 1.02 | 1.01 to 1.04 | 0.008 |
| Pain                          |                |              |      |              |       |
| No                            | 87             | 73           | 1    |              |       |
| Yes                           | 129            | 114          | 1.44 | 1.05 to 1.96 | 0.022 |
| Albumin, g/L                  | 216            | 187          | 0.97 | 0.94 to 0.99 | 0.022 |
| Tumour size, mm               | 216            | 187          | 1.01 | 1.00 to 1.02 | 0.066 |
| CA 19-9, U/ml (log-value)     | 216            | 187          | 1.03 | 0.89 to 1.20 | 0.703 |
| Systolic blood pressure, mmHg | 216            | 187          | 1.01 | 1.00 to 1.02 | 0.004 |
| Well differentiated           | 42             | 33           | 1    |              |       |
| Moderately differentiated     | 33             | 27           | 1.53 | 0.91 to 2.58 |       |
| Poorly differentiated         | 22             | 21           | 1.78 | 1.01 to 3.14 |       |
| Not assessed                  | 119            | 106          | 1.57 | 1.05 to 2.35 | 0.114 |

Abbreviations: CI: denotes confidence interval, HR: Hazard Ratio

C

| Parameter                  | Complete-subject analysis<br>( <i>N</i> = 358) |        |          | Multiple imputation analysis<br>(MCMC, <i>N</i> = 1000 imputed dataset) |         |          |
|----------------------------|------------------------------------------------|--------|----------|-------------------------------------------------------------------------|---------|----------|
|                            | $\beta$                                        | SE     | <i>P</i> | $\beta$                                                                 | SE      | <i>P</i> |
| Age at diagnosis, years    | 0.0125                                         | 0.0063 | 0.0478   | 0.01217                                                                 | 0.00560 | 0.0298   |
| Pain                       | 0.2562                                         | 0.1193 | 0.0317   | 0.23995                                                                 | 0.11055 | 0.0300   |
| Albumin, g/L               | -0.0382                                        | 0.0111 | 0.0006   | -0.03911                                                                | 0.01085 | 0.0003   |
| Tumour size, mm            | 0.0080                                         | 0.0035 | 0.0214   | 0.00810                                                                 | 0.00332 | 0.0148   |
| CA 19-9, UI/mL (log-value) | 0.1587                                         | 0.0573 | 0.0056   | 0.11556                                                                 | 0.05268 | 0.0283   |

## **Appendix A3 - General theoretical aspects**

### **Risk estimation by a Cox model**

The survival estimate for the patient j at time t based on the Cox model is computed as follows:

General formula:

$$S(t, X_j) = S_0(t) \exp(\sum_{i=1}^p \beta_i X_{ij} - \sum_{i=1}^p \beta_i \bar{X}_i) S(t, X_j) = S_0(t) \exp(\sum_{i=1}^p \beta_i (X_{ij} - \bar{X}_i))$$

where:

- $\beta_i$  is the estimated regression coefficient  $i=1..p$
- $S_0(t)$  is the baseline survival at time t
- $X_{ij}$  the value of the  $i$ th risk factor for the patient j
- $\bar{X}_i$  the mean of value of the risk factor i in the population (to compute if the risk factor is quantitative)
- And p denotes the number of risk factors.

### **Nomogram development**

Coefficients of the final Cox regression model were used to generate a nomogram allowing individual median survival and survival probability predictions at different time points (6, 12, 24, and 48 months).

#### **Survival probability estimation at time of interest**

The Cox regression linear predictor function (LP<sub>j</sub>) compared with the average risk profile was obtained by summing up the products between the characteristic i of patient j ( $X_{ij}$ ) less the average value of the characteristic (if quantitative) and corresponding Cox coefficient ( $\beta_i$ ):

$$LP_j = \sum_{i=1}^p \beta_i \times (X_{ij} - \bar{X}_i)$$

For example, the 6-month survival probability for a patient j is given by the following formula:

$$S(6, X_j) = S_0(6) \exp(\sum_{i=1}^p \beta_i (X_{ij} - \bar{X}_i)) = S_0(t) \exp(LP_j)$$

where,  $S_0(6)$  is the basis risk at 6 months.



## Median survival estimation

Median overall survival by definition is the time,  $\tau$ , such that  $S(\tau) = 0.5$ . However, in practice, it is defined as the smallest time such that observed  $S(\tau) \leq 0.5$ . The median is more appropriate for censored survival data than the mean.

With a mathematical formulation:

$$\begin{aligned} \text{Median OS}_j &= \min \left( t / S(t, X_j) \leq \frac{1}{2} \right) \\ S(t, X_j) &= S_0(t)^{\exp(LP_j)} = \frac{1}{2} \\ \Leftrightarrow \ln \left( S_0(t)^{\exp(LP_j)} \right) &= \ln \left( \frac{1}{2} \right) \\ \Leftrightarrow \exp(LP_j) \ln(S_0(t)) &= \ln \left( \frac{1}{2} \right) \\ \Leftrightarrow \ln(S_0(t)) &= \ln \left( \frac{1}{2} \right) \exp(-LP_j) \\ \Leftrightarrow t / S_0(t) &= \exp \left( \ln \left( \frac{1}{2} \right) \exp(-LP_j) \right) \\ \min(t) / S_0(t) &= \exp \left( \ln \left( \frac{1}{2} \right) \exp(-LP_j) \right) \end{aligned}$$

## Survival estimation confidence interval

The confidence limits for individual survival estimations need firstly to derived confidence limits around the Cox regression linear predictor function ( $LP_j$ ).

The 97.5th quantile of the standard normal distribution is 1.96.

Indeed, with

the  $\left( 100 - \frac{\alpha}{2} \right)$ th quantile of the standard normal distribution is equal to a

$$\begin{aligned} (1 - \alpha)\% \text{CI } LP_j &= [\text{Lower } LP_j; \text{Upper } LP_j] \\ &= [LP_j - a \times \text{Standard Error}(LP_j); LP_j + a \times \text{Standard Error}(LP_j)] \end{aligned}$$

And then for example a time  $t$ ,

$$\begin{aligned} (1 - \alpha)\% \text{CI } S(t, X_j) &= (1 - \alpha)\% \text{CI } S_0(t)^{\exp(LP_j)} \\ &= [S_0(t)^{\exp(\text{Upper } LP_j)}; S_0(t)^{\exp(\text{Lower } LP_j)}] \end{aligned}$$

So For a patient  $j$  we need to calculate the standard error of its Cox regression linear predictor  $LP_j$ .

If we consider

$$X_j = \begin{pmatrix} X_{1,j} \\ X_{2,j} \\ \vdots \\ X_{p-1,j} \\ X_{p,j} \end{pmatrix} \text{ the vector for the risk factor values for the patient } j$$

$$\bar{X} = \begin{pmatrix} \bar{X}_1 \\ \bar{X}_2 \\ \vdots \\ \bar{X}_{p-1} \\ \bar{X}_p \end{pmatrix} \text{ the vector for the mean of the risk factor observed in the patients involved in}$$

the cox multivariate analysis

$$VCov(X) = \begin{pmatrix} \text{Var}(X_1) & \text{Cov}(X_1, X_2) & \cdots & \text{Cov}(X_1, X_p) \\ \text{Cov}(X_2, X_1) & \ddots & \cdots & \vdots \\ \vdots & \vdots & \ddots & \vdots \\ \text{Cov}(X_p, X_1) & \cdots & \cdots & \text{Var}(X_p) \end{pmatrix} \text{ the covariance matrix (issued from the model)}$$

Then

$$\text{Standard Error}(LP_j) = t(X_j - \bar{X}) \times VCov(X) \times (X_j - \bar{X})$$

### Risk factors and attributed points

For each factor, the maximum score assigned to each variable presented in Table 3 are provided by the following formula:

For a risk factor i the maximal points equal to:

$$\text{Points}_{\max_i} = 100 \times \frac{\beta_i |\max_i - \min_i|}{\beta_j |\max_j - \min_j|} = 100 \times \frac{\text{Absolute range } \beta_i \text{ value}}{\text{Absolute range } \beta_j \text{ value}}$$

where the factor j is that with the maximum absolute range  $\beta$  value and max and min are the limits of the factor variation with a sorting value less to higher risk with the outcome.

Then, the points for a patient j with the factor i equal to b are deduced as following:

$$\text{Points}_{ij} = |b - \min_i| \times \frac{\text{Score}_{\max_i}}{|\max_j - \min_j|}$$

The total points score for a patient j is equal to:

$$\text{Total Points}_j = \sum_i \text{Points}_{ij}$$

## Nomogram Illustration

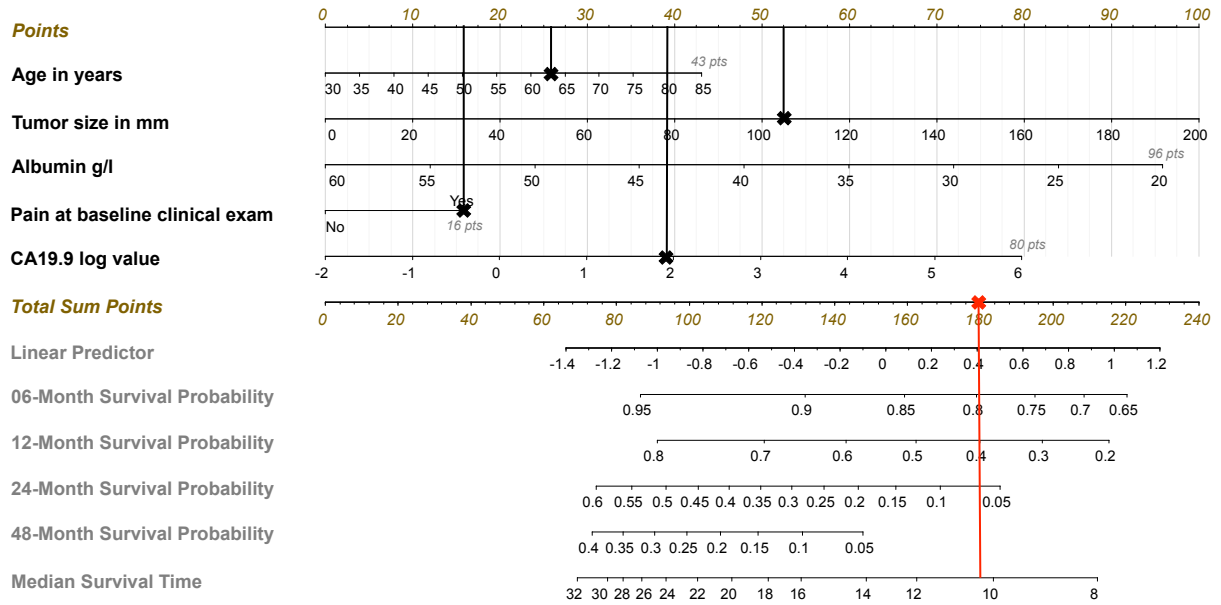

## Construction of the PROLAP prognostic score

### Derived from the multivariate final Cox model:

$$\text{Raw prognostic score}_{\text{Cox model}} = \begin{aligned} & \text{Age in years} \times \alpha \\ & \text{Pain} \binom{0}{1} \times \beta \\ & \text{Albumin in g/L} \times \gamma \\ & \text{Tumor size in mm} \times \delta \\ & \text{CA19.9 Log value} \times \varepsilon \end{aligned}$$

$\alpha, \beta, \gamma, \delta$  and  $\varepsilon$  : Cox-model beta coefficient for the corresponding parameters.

Raw prognostic score<sub>Cox model</sub>  $\in$  [min\_score – max\_score]  
: *theoretical range with the best and the worst profile for each risk factors*

$$\begin{aligned} \text{Normalized prognostic score}_{\text{Cox model}} \\ = \frac{(5 - 0) \times (\text{Raw Prognostic score}_{\text{Cox model}} - \text{min\_score})}{\text{max\_score} - \text{min\_score}} + 0 \end{aligned}$$

Normalized prognostic score<sub>Cox model</sub>  $\in$  [0 – 5]

### Derived from the nomogram:

If the attributed points for each risk factor in the nomogram are considered, a raw prognostic score derived from the nomogram can be calculated as follows:

$$\begin{aligned} \text{Raw prognostic score}_{\text{nomogram}} \\ = & (\text{Age in years} - \text{min}) \times \frac{\text{max points}_{\text{age}}}{\text{max}_{\text{age}} - \text{min}_{\text{age}}} \\ & \text{Pain} \binom{0}{1} \times \text{max points}_{\text{age}} \\ = & \left| \text{Albumin in } \frac{\text{g}}{\text{L}} - \text{min}_{\text{albumin}} \right| \times \frac{\text{max points}_{\text{albumin}}}{|\text{max}_{\text{albumin}} - \text{min}_{\text{albumin}}|} \\ & (\text{Tumor size in mm} - \text{min}_{\text{tumorsize}}) \times \frac{\text{max points}_{\text{tumorsize}}}{\text{max}_{\text{tumorsize}} - \text{min}_{\text{tumorsize}}} \\ & |\text{CA19.9 Log value} - \text{min}_{\text{CA19.9}}| \times \frac{\text{max points}_{\text{CA19.9}}}{|\text{max}_{\text{CA19.9}} - \text{min}_{\text{CA19.9}}|} \end{aligned}$$

Raw prognostic score<sub>nomogram</sub>  $\in$  [min\_score – max\_score]

$$\text{Normalized prognostic score}_{nomogram} = \frac{(5 - 0) \times (\text{Raw Prognostic score}_{nomogram} - \text{min\_score})}{\text{max\_score} - \text{min\_score}} + 0$$

$$\text{Normalized prognostic score}_{nomogram} \in [0 - 5]$$

$$\text{Normalized prognostic score}_{nomogram} = \text{Normalized prognostic score}_{\text{Cox model}}$$

**Determination of cut-off values in total sum of points derived from the nomogram in order to determine groups issued from the normalized prognostic score of the model:**

We previously observed that:

$$\text{Normalized Prognostic score}_{nomogram} = \text{Normalized Prognostic score}_{\text{Cox model}}$$

$$\frac{(5 - 0) \times (\text{Raw Prognostic score}_{nomogram} - \text{min\_score})}{\text{max\_score}} + 0 = \text{Normalized Prognostic score}_{\text{Cox model}}$$

$$\text{Normalized Prognostic score}_{\text{Cox model}} = 2.29 \rightarrow \text{Raw Prognostic score}_{nomogram} = 155.3$$

Given these calculations, the two risk groups of patients can be characterized as following:

- Low-risk group: a score < 2.29 or a total number of points from the nomogram < 155.3,
- High-risk group: a score  $\geq$  2.29 or a total number of points by the nomogram  $\geq$  155.3.

**Appendix Figure A1. An optimal cut point determined by Hothorn & Lausen method**

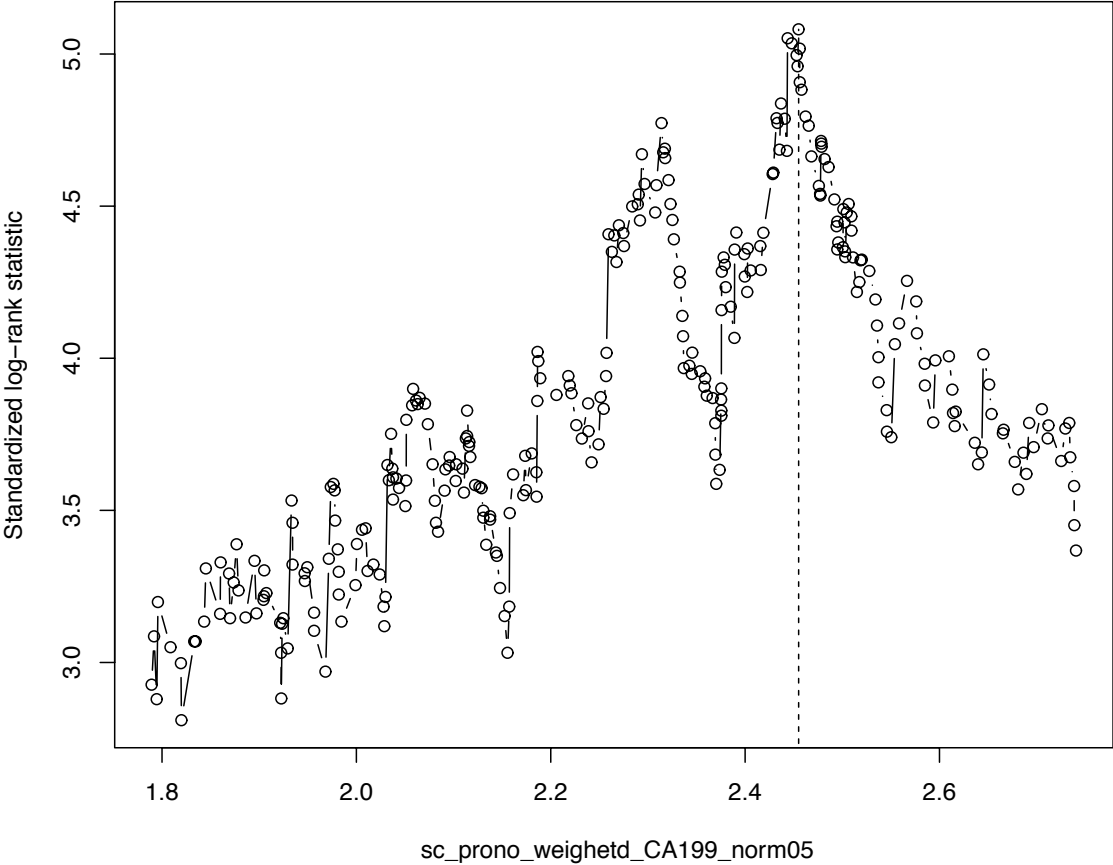

**Appendix Figure A2: Kaplan-Meier curves for overall survival in (A,C) the development set cohort and (B,D) the external validation set cohort according to the prognostic score group using the median and tertile approach**

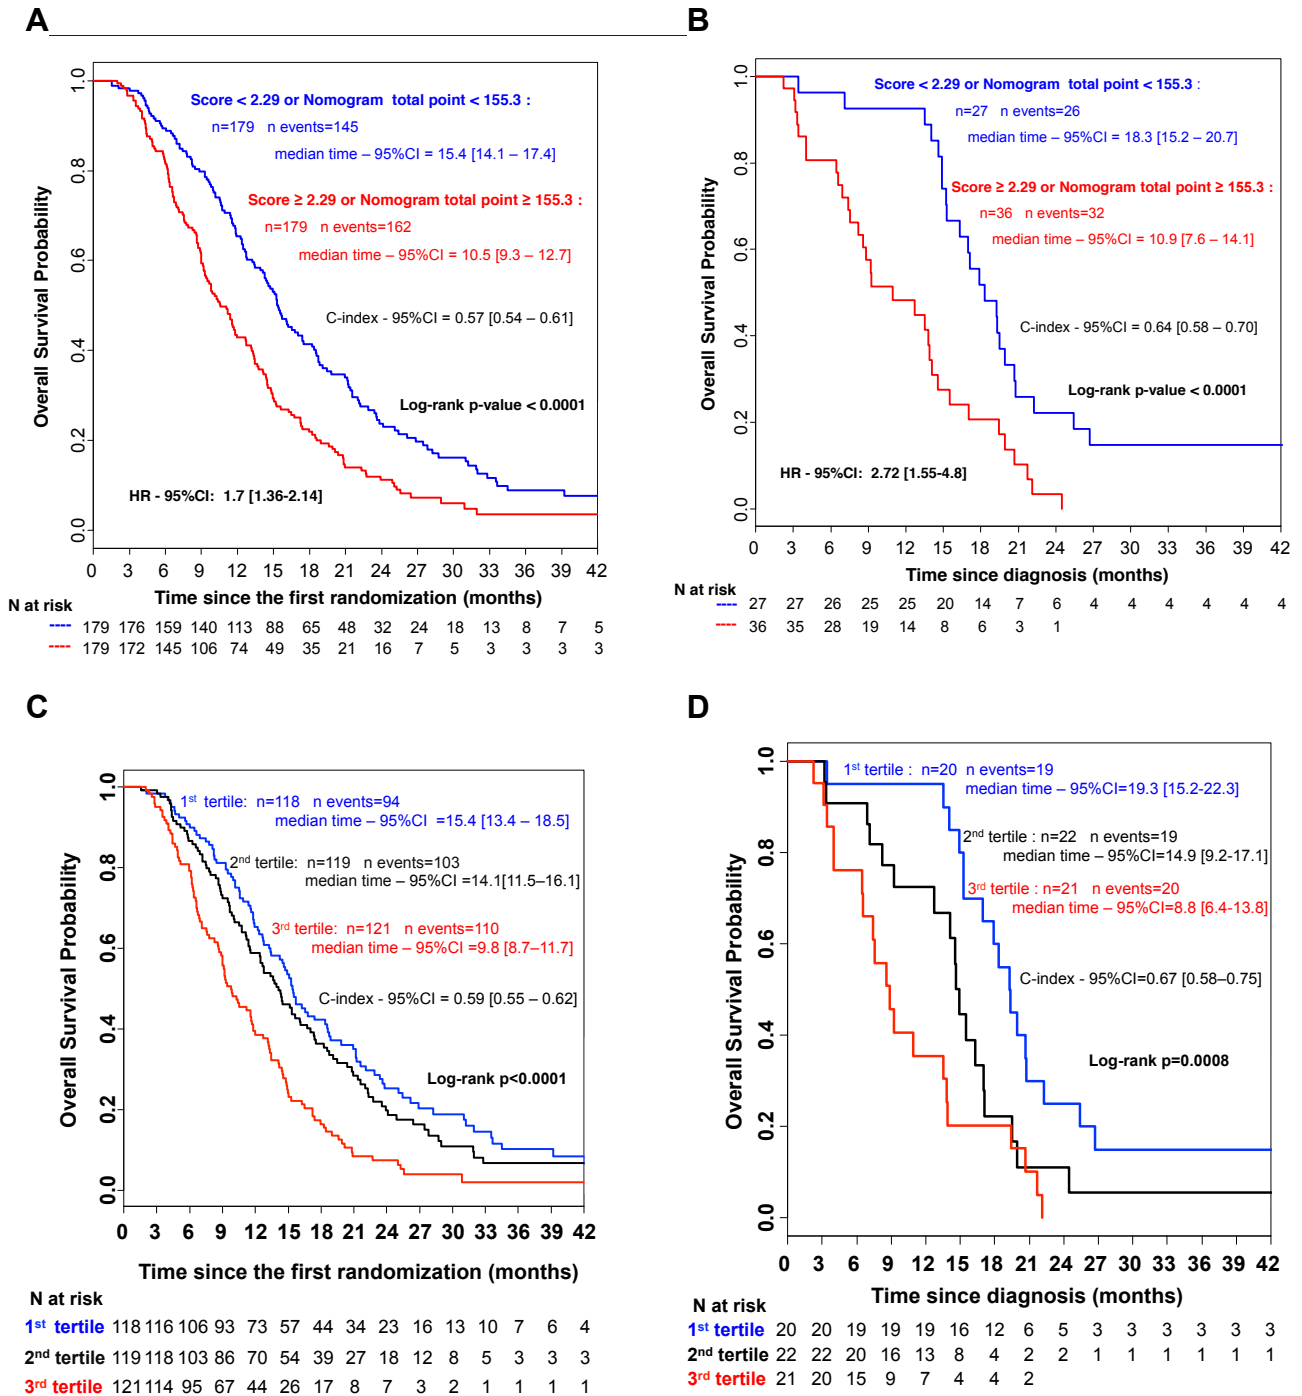

**Appendix Table A1. Patient characteristics in (A) two risk and (B) three prognostic risk groups**

A

|                                 | Prognostic risk group              |                                     | Global<br><i>P</i> |
|---------------------------------|------------------------------------|-------------------------------------|--------------------|
|                                 | Low<br>[0,2.455]<br><i>N</i> = 242 | High<br>[2.455,5]<br><i>N</i> = 116 |                    |
| <b>Age at diagnosis, years*</b> | 61.4 ± 9.5                         | 68.1 ± 7.8                          | < 0.0001           |
| <b>Pain</b>                     |                                    |                                     |                    |
| <b>No</b>                       | 126 (52%)                          | 29 (25%)                            |                    |
| <b>Yes</b>                      | 116 (48%)                          | 87 (75%)                            | < 0.0001           |
| <b>Albumin, g/L*</b>            | 39.4 ± 5.1                         | 34.7 ± 5.3                          | < 0.0001           |
| <b>Tumour size, mm*</b>         | 40.4 ± 13.9                        | 52.4 ± 22.9                         | < 0.0001           |
| <b>CA 19.9, UI (log-value)*</b> | 2.0 ± 1.0                          | 3.1 ± 0.9                           | < 0.0001           |

\* Plus-minus values are means ± standard deviation

B

|                                 | Prognostic risk group              |                                                 |                                    | Global<br><i>P</i> |
|---------------------------------|------------------------------------|-------------------------------------------------|------------------------------------|--------------------|
|                                 | Low<br>[0,2.291]<br><i>N</i> = 178 | Intermediate<br>[2.291,2.720]<br><i>N</i> = 137 | High<br>[2.720,5]<br><i>N</i> = 43 |                    |
| <b>Age at diagnosis, years*</b> | 60.2 ± 9.3                         | 66.4 ± 9.3                                      | 68.6 ± 7.6                         | < 0.0001           |
| <b>Pain</b>                     |                                    |                                                 |                                    |                    |
| <b>No</b>                       | 101 (57%)                          | 45 (33%)                                        | 9 (21%)                            |                    |
| <b>Yes</b>                      | 77 (43%)                           | 92 (67%)                                        | 34 (79%)                           | < 0.0001           |
| <b>Albumin, g/L*</b>            | 40.2 ± 5.0                         | 36.7 ± 4.8                                      | 32.1 ± 5.3                         | < 0.0001           |
| <b>Tumour size, mm*</b>         | 37.7 ± 12.0                        | 47.4 ± 16.3                                     | 61.7 ± 28.4                        | < 0.0001           |
| <b>CA 19.9, UI (log-value)*</b> | 1.8 ± 1.0                          | 2.7 ± 0.9                                       | 3.3 ± 0.9                          | < 0.0001           |

\* Plus-minus values are means ± standard deviation



## **Appendix A4 Predictive value of treatments on OS according to the risk groups**

### **Two risk group approach**

There were no differential effects on OS for the gemcitabine-erlotinib combination across the two risk groups (high: log-rank  $P = 0.2209$ ; low: log-rank  $P = 0.9579$ ). A total of 162 (67%) low-risk and 65 (56%) high-risk patients reached the second randomization ( $P = 0.047$ ). Similarly, there was no significant OS difference in favour of chemoradiotherapy over chemotherapy across the two risk groups (low: log-rank  $P = 0.5963$ ; high:  $P = 0.8334$ ).

### **Three risk group approach**

There were no differential effects on OS for the gemcitabine-erlotinib combination across the three risk groups (high: log-rank  $P = 0.1420$ ; intermediate: log-rank  $P = 0.9376$ ; low: log-rank  $P = 0.2601$ ). A total of 121 (68%) low-risk, 85 (62%) intermediate risk, and 19 (44%) high-risk patients reached the second randomization ( $P = 0.0027$ ). Similarly, there was no significant OS difference in favour of chemoradiotherapy over chemotherapy across the three risk groups (high: log-rank  $P = 0.8646$ ; intermediate: log-rank  $P = 0.4082$ ; low: log-rank  $P = 0.4924$ ).

**Appendix Table A2. Baseline characteristics of the external validation set cohort according to the eligibility status for staging system**

|                                                       |                                  | <b>Patient eligible for staging system (N = 63)</b> | <b>Patient not eligible for staging system (N = 43)</b> | <b>P</b> |
|-------------------------------------------------------|----------------------------------|-----------------------------------------------------|---------------------------------------------------------|----------|
| <b>Age, years*</b>                                    |                                  | 67.1 ± 10.6                                         | 67.1 ± 9.7                                              | 0.9790   |
| <b>Gender, N (%)</b>                                  | <i>Male</i>                      | 33 (52%)                                            | 24 (56%)                                                | 0.7278   |
|                                                       | <i>Female</i>                    | 30 (48%)                                            | 19 (44%)                                                |          |
| <b>Localization, N (%)</b>                            | <i>Head/Head and Body</i>        | 42 (69%)                                            | 29 (71%)                                                | 0.8397   |
|                                                       | <i>Other (body and/or tail)</i>  | 19 (31%)                                            | 12 (29%)                                                |          |
|                                                       | <i>Unknown</i>                   | 2                                                   | 2                                                       |          |
| <b>Grading, N (%)</b>                                 | <i>Well differentiated</i>       | 4 (17%)                                             | 5 (45%)                                                 | 0.1336   |
|                                                       | <i>Moderately differentiated</i> | 14 (61%)                                            | 3 (27%)                                                 |          |
|                                                       | <i>Poorly differentiated</i>     | 5 (22%)                                             | 3 (27%)                                                 |          |
|                                                       | <i>Missing</i>                   | 40                                                  | 32                                                      |          |
| <b>PS (WHO), N (%)</b>                                | <i>0</i>                         | 19 (30%)                                            | 12 (29%)                                                | 0.7048   |
|                                                       | <i>1</i>                         | 33 (52%)                                            | 26 (62%)                                                |          |
|                                                       | <i>2</i>                         | 10 (16%)                                            | 4 (10%)                                                 |          |
|                                                       | <i>3</i>                         | 1 (2%)                                              | 0 (0%)                                                  |          |
|                                                       | <i>Missing</i>                   | 0                                                   | 1                                                       |          |
| <b>RECIST tumour size (mm)*</b>                       |                                  | 38.0 ± 14.9                                         | 38.9 ± 14.4                                             | 0.7727   |
|                                                       | <i>Missing</i>                   | 0                                                   | 9                                                       |          |
| <b>RECIST tumour size (mm), N (%)</b>                 | <i>&lt;30</i>                    | 16 (25%)                                            | 6 (18%)                                                 | 0.5694   |
|                                                       | <i>30-50</i>                     | 34 (54%)                                            | 22 (65%)                                                |          |
|                                                       | <i>≥50</i>                       | 13 (21%)                                            | 6 (18%)                                                 |          |
|                                                       | <i>Missing</i>                   | 0                                                   | 9                                                       |          |
| <b>Median overall survival time in months 95%CI †</b> |                                  | 14.9<br>(13.5 to 17.1)                              | 14.9<br>(11.1 to 21.3)                                  | 0.2465   |

\* Plus–minus values are means ± standard deviation

† Compared with log-rank test

Abbreviations: PS, performance status, WHO: World Health Organization.
